1 **Progressive sub-MIC Exposure of *Klebsiella pneumoniae* 43816 to Cephalothin Induces the**  
2 **Evolution of beta-lactam Resistance without Acquisition of beta-lactamase Genes**

3 Running Title: Antibiotic Resistance Evolved via sub-MIC Antibiotic Exposure

4 Jasmine R. Anderson, Nghi B. Lam, Jazmyne L. Jackson, Sean M. Dorenkott, Taylor Ticer, Emir  
5 Maldosevic, Amanda Velez, Megan R. Camden, and Terri N. Ellis\*

6 University of North Florida, Department of Biology, Jacksonville, Florida 32224

7

8 \*Correspondence:

9 Terri N. Ellis, Ph.D

10 University of North Florida

11 Department of Biology

12 1 UNF Drive

13 Building 59, Room 3312

14 Jacksonville, FL 32224

15 904-620-5766

16 [terri.ellis@unf.edu](mailto:terri.ellis@unf.edu)

17

## 18 Abstract

19 Bacterial exposure to antibiotic concentrations below the minimum inhibitory  
20 concentration (MIC) may result in a selection window allowing for the rapid evolution of  
21 resistance. These sub-MIC concentrations are commonly found in the greater environment. This  
22 study aimed to evaluate the adaptive genetic changes in *Klebsiella pneumoniae* 43816 after  
23 prolonged but increasing sub-MIC levels of the common antibiotic cephalothin over a fourteen-  
24 day period. Over the course of the experiment, antibiotic concentrations increased from 0.5  
25  $\mu\text{g}/\text{mL}$  to 7.5  $\mu\text{g}/\text{mL}$ . At the end of this extended exposure, the final adapted bacterial culture  
26 exhibited clinical resistance to both cephalothin and tetracycline, altered cellular and colony  
27 morphology, and a highly mucoid phenotype. Cephalothin resistance exceeded 125  $\mu\text{g}/\text{mL}$   
28 without the acquisition of beta-lactamase genes. Whole genome sequencing identified a series of  
29 genetic changes that could be mapped over the fourteen-day exposure period to the onset of  
30 antibiotic resistance. Specifically, mutations in the *rpoB* subunit of RNA Polymerase, the  
31 *tetR/acrR* regulator, and the *wcaJ* sugar transferase each fix at specific timepoints in the  
32 exposure regimen where the MIC susceptibility dramatically increases. These mutations indicate  
33 that alterations in the secretion of colanic acid and attachment of colonic acid to LPS, may  
34 contribute to the resistant phenotype. These data demonstrate that very low, sub-MIC  
35 concentrations of antibiotics can have dramatic impacts on the bacterial evolution of resistance.  
36 Additionally, this study demonstrates that beta-lactam resistance can be achieved through  
37 sequential accumulation of specific mutations without the acquisition of a beta-lactamase gene.

38

39           **Importance:** Bacteria are constantly exposed to low levels of antibiotics in the  
40 environment. The impact of this low-level exposure on bacterial evolution is not well  
41 understood. In this work, we developed a model to expose *Klebsiella pneumoniae* to progressive,  
42 low doses of the antibiotic cephalothin. After a fourteen-day exposure regimen, our culture  
43 exhibited full clinical resistance to this antibiotic without the traditional acquisition of  
44 inactivating genes. This culture also exhibited resistance to tetracycline, had a highly mucoid  
45 appearance, and exhibited altered, elongated cellular morphology. Whole genome sequencing  
46 identified a collection of mutations to the bacterial genome that could be mapped to the  
47 emergence of the resistant phenotype. This study demonstrates that antibiotic resistance can be  
48 achieved in response to low level antibiotic exposure and without the traditional acquisition of  
49 resistance genes. Further, this study identifies new genes that may play a role in the evolution of  
50 antibiotic resistant bacteria.

51

52   **Keywords:** *Klebsiella pneumoniae*, antibiotic resistance, selection window, capsule, beta-  
53 lactams

## 54 **Introduction**

55           The mis- and overuse of antibiotics by the medical and agricultural industries has created  
56 a basal level of antibiotic exposure present in our environment (1–5). Antibiotics may be  
57 introduced into the environment via three major pathways. The first is from urine and excretions  
58 of people, pets, and livestock. Between 40-90% of administered antibiotics are excreted through  
59 urine and feces with the molecule still in its active form (1). Second, antibiotics such as  
60 chlorhexidine are used in commercial agriculture and aquaculture (3). These substances can then  
61 contaminate nearby lands via wastewater and groundwater seepage (1, 6). Finally, antibiotics can  
62 enter the local environment through improper disposal of unused or expired prescriptions (1, 3).  
63 While concentrations of antimicrobial substances in the environment will vary based on location  
64 and potential sources of contamination, it is generally agreed that the residual environmental  
65 antibiotic concentration is not high enough to eradicate native bacterial populations. However,  
66 even at low concentrations these compounds become a source of survival stress for bacteria in the  
67 soil and water supplies. Concentrations below the bacteriostatic limit, referred to as sub-MIC  
68 levels, may result in the creation of a selection window for bacteria (7–9). This window is the  
69 concentration at which the occurrence of genomic mutations is highest and can lead to the  
70 development of clinical antibiotic resistance in pathogens.

71           Experiments have shown that sub-MIC antibiotic treatment can alter the resistance profile,  
72 nutrient use, protein expression, gene transcription and mutation rates among common nosocomial  
73 pathogens (4, 10, 11). However, current studies of sub-MIC exposure and bacterial adaptation have  
74 a number of limitations. First, these experiments frequently utilize strains of bacteria either known  
75 to harbor antibiotic resistance genes or are otherwise clinically resistant to one specific class of  
76 antibiotic. Second, the experimental designs include only brief exposure times to antibiotics. In

77 most studies, the samples were exposed to the antibiotic for only 24-48 hours, providing limited  
78 time for the bacteria to evolve novel genetic changes like those seen in a clinical or environmental  
79 setting where antibiotic exposure is both consistent and long term. Finally, genetic analyses  
80 frequently used pre-determined targets, or the phenotypes assumed from mutations in  
81 predetermined targets. While the results of these studies are informative, they are not comparable  
82 to situations in which antibiotic resistance phenotypes evolve over time through prolonged sub-  
83 lethal antibiotic exposure.

84 In this study, we utilized *Klebsiella pneumoniae* 43816, which does not exhibit clinical  
85 resistance to the major antibiotic classes. Bacterial cells were cultured using a progressive  
86 exposure method to gradually increasing sub-MIC concentrations of the beta-lactam antibiotic  
87 cephalothin over a fourteen day period. At the end of this prolonged exposure period to sub-MIC  
88 concentrations the bacteria exhibited clinical resistance to both cephalothin and tetracycline,  
89 altered cellular and colony morphology, and a highly mucoid phenotype. Whole genome  
90 sequencing identified a series of genetic changes that could be mapped over the fourteen-day  
91 exposure period to the onset of antibiotic resistance. Specifically, mutations in the *rpoB* subunit  
92 of RNA Polymerase, the *tetR/acrR* regulator, and the *wcaJ* sugar transferase each fix at specific  
93 points in the exposure regimen where the MIC susceptibility dramatically increases. These  
94 mutations indicate that secretion and export of colanic acid, and its association to  
95 lipopolysaccharides, may contribute to the resistant phenotype. These data demonstrate that very  
96 low, sub-MIC concentrations of antibiotics can have dramatic impacts on the bacterial evolution  
97 of resistance. Additionally, this study demonstrates that antibiotic resistance can be achieved  
98 through accumulation of mutations without the traditional acquisitions of beta-lactamase or other  
99 drug inactivating genes.

## 100 **Materials and Methods**

### 101 **Bacterial Strains and Progressive Antibiotic Exposure**

102 *Klebsiella pneumoniae* 43816 (ATCC, Manassas, VA) was used as the starting culture for  
103 the progressive antibiotic exposure experiment (Figure 1). All cultures were grown in Luria-  
104 Bertani (LB) broth (BD Difco, Franklin Lakes, NJ) at 37°C with shaking at 200 rpm. All  
105 antibiotics and reagents are from Thermo Fisher Scientific (Waltham, MA) unless otherwise  
106 indicated. *K. pneumoniae* was grown overnight from frozen stocks and 50 µL of this culture was  
107 added to 5 mL of fresh LB with 0.5 µg/mL cephalothin added. The concentration of 0.5 µg/mL  
108 cephalothin was significantly below the MIC for this organism. Cultures were grown for 12  
109 hours, at which point 50 µL were transferred to 5 ml of fresh LB with the same concentration of  
110 cephalothin. After a total of 24 hours exposure to one dose of antibiotics, 50 µL of culture were  
111 transferred to a new 5 mL of LB with a higher concentration of cephalothin. Each stepwise  
112 exposure increased the dose of cephalothin by 0.5 µg/mL, to a final dose of 7.5 µg/mL  
113 cephalothin. An untreated culture of *K. pneumoniae* 43816 was grown in parallel without the  
114 addition of antibiotic. Frozen glycerol stocks were made of each culture at each 12-hour transfer  
115 point for later analysis. *Klebsiella pneumoniae* 43816  $\Delta wcaJ$  (VK646) was kind gift from  
116 Kimberly A. Walker and Virginia Miller at UNC Chapel Hill (12).

### 117 **Bacterial Growth and Morphology**

118 At the 12-hour timepoint in each exposure, the bacteria were transferred to fresh LB with  
119 antibiotic. At this point, the time required for the bacterial culture to reach an OD<sub>600</sub> of 1.0 was  
120 determined using an Eppendorf Biophotometer (Hamburg, Germany). Decreases in the growth

121 rate were determined by subtracting the elapsed time for the treated culture from the average  
122 time to OD<sub>600</sub> 1.0 of all untreated cultures (142 minutes).

123 Changes in colony morphology were determined by quadrant streaking on LB agar  
124 plates. To determine cellular morphology, overnight bacterial cultures were centrifuged at 5,000  
125 rpm for 5 minutes and re-suspended in phosphate-buffered saline (PBS) (pH 8.0). Samples were  
126 then diluted in PBS to an optical density of approximately 1.0 OD<sub>600</sub>. Cells were negative stained  
127 with 1% Nigrosin and visualized by brightfield microscopy at 1,000 x with an oil immersion  
128 lens.

### 129 **Determination of Minimum Inhibitory Concentration Breakpoints**

130 Broth microdilution assays were used to determine the minimum inhibitory concentration  
131 (MIC) of tetracycline, amikacin and five different beta-lactam antibiotics (Cephalothin,  
132 Cefoxitin, Cefotaxime, Cefepime, and Imipenem). The beta-lactam drugs were chosen as  
133 representative of different generations of cephalosporin antibiotics and a carbapenem,  
134 respectively. 96 well plates were seeded with LB broth containing 10<sup>3</sup> CFU/mL starting  
135 concentration of bacteria. Antibiotics were added in a two- fold serial dilution starting at 500  
136 µg/mL. Cultures were incubated overnight, and growth was measured at OD<sub>600</sub> using a Biotek  
137 Gen5 plate reader (Winooski, VT). Wells containing only LB and bacteria were used as controls  
138 for normal growth. The MIC breakpoint was determined as the lowest antibiotic concentration at  
139 no increase in optical density over a broth only control was detected. All samples were tested in  
140 triplicate.

### 141 **Genomic DNA Isolation**

142 Genomic DNA was extracted using a protocol modified from Wright et. al. (13). Briefly,  
143 50 mL of overnight culture was pelleted for 10 minutes at 10,000 rpm at 4°C. The pellet was  
144 washed twice with TE25S buffer (25 mM Tris-HCl, 25 mM EDTA, 0.3 M sucrose, pH 8.0) and  
145 resuspended in TE25S with 10 mg/mL lysozyme and RNase. The mixture was incubated for two  
146 hours at 37°C with shaking at 150 rpm. Proteinase K and 10% SDS were added and incorporated  
147 by inversion and incubated for 1-2 hours at 50-55°C with periodic inversions. 5M NaCl was  
148 added followed by 3.25 mL of CTAB (Cetyl Trimethyl Ammonium Bromide)/NaCl. The  
149 solution was mixed by inversion and incubated at 55°C for 10 minutes. A 24:1  
150 chloroform/isoamyl alcohol solution was added and incubated at room temperature with shaking  
151 at 100 rpm for 20 minutes. After incubation, the solution was centrifuged at 10,000 rpm and 4°C  
152 for 15 minutes, and the upper aqueous layers were transferred into fresh tubes. This chloroform  
153 treatment was repeated a second time. The upper aqueous layers of both samples were combined  
154 with an 0.6 volume of isopropyl alcohol and the mixture was gently inverted. After five minutes,  
155 the purified DNA was spooled from the tube onto a sterile Pasteur pipette. The spooled DNA  
156 was washed with approximately 5 mL of 70% ethanol and dried before being suspended in  
157 300µL of EB buffer (QIAGEN, Hilden, Germany). Purified DNA was quantified by Qubit  
158 (Thermofisher).

## 159 **Genome Sequencing**

160 Whole genome sequencing was performed on the following *K. pneumoniae* samples:  
161 days 1-14 of the adaptation experiment the small colony forming variant, the large colony  
162 forming variant, and the untreated sample after 14 days of culture. These DNA samples were  
163 analyzed by the Microbial Genome Sequencing Center (<https://www.migscenter.com>) which  
164 utilized an Illumina sequencing technique similar to that used by Baym et. al. (14). Samples were



165 compared against the published reference sequence NZ\_CP009208.1 for *K. pneumoniae* 43816  
166 (15). Any variations were analyzed using a proprietary breseq variant calling algorithm (16).

167 To confirm these results, and to extend our analysis to include SNPs within promoter  
168 regions, endpoint samples of DNA from *K. pneumoniae* 43816, the fourteen-day antibiotic  
169 adapted culture, and the fourteen-day untreated population were also analyzed using SMRT Cell  
170 Sequencing by the National Center for Genome Resources ([www.ncgr.org](http://www.ncgr.org)). Samples were again  
171 compared against the published reference sequence NZ\_CP009208.1 for *K. pneumoniae* 43816  
172 (15). Genetic variation between genomes was calculated using a modified form of  $F_{ST}$  or analysis  
173 of variance referred to as  $\Theta$  (17).  $F_{ST}$  values are evaluated against the null hypothesis that the  
174 populations are not genetically unique (17). Pacific Biosciences calculated allele frequencies and  
175 utilized a proprietary Quiver Algorithm to maximize accuracy in sequence reads using variation  
176 between the published genome and prior records.

177 The complete genome sequences are available via the NCBI BioProject data base. The  
178 project ID is PRJNA854906.

### 179 **Capsule Extraction and Characterization**

180 Capsular polysaccharide (CPS) was extracted using the protocol outlined by Domineco *et*  
181 *al.* (18). Briefly, 500  $\mu$ L of an overnight culture were mixed with 100  $\mu$ L of 1% Zwittergent 3-14  
182 in 100 mM citric acid, pH 2.0. The mixture was vortexed vigorously, incubated at 50°C for 20  
183 minutes, and centrifuged for 5 minutes at 14,000 rpm. The supernatant was then transferred to a  
184 fresh tube, mixed with 1.2 mL of absolute ethanol, and incubated for 90 minutes at 4°C. Precipitate  
185 was collected after centrifugation at 14,000 rpm for 10 minutes and dissolved in 200  $\mu$ L DI water.

186 CPS D-glucuronic acid was quantified following a previously established protocol by Lin  
187 *et al.*(19). Purified CPS was vortexed vigorously with 1.2mL of 12.5mM sodium tetraborate in  
188 concentrated sulfuric acid and heated for 5 minutes at 95°C. The samples were cooled before the  
189 addition of 20 µL of 0.15% m-hydroxydiphenyl; and the absorbance was measured at 540 nm. A  
190 standard curve was generated using D-glucuronic acid to determine the concentration of  
191 glucuronic acid in the CPS samples. To ensure quantification of CPS from the same number of  
192 bacteria, strains were normalized to 10<sup>8</sup> CFUs/mL. Each assay was performed in triplicate from  
193 six individual cultures.

194 The extracted capsule samples were also quantified for protein content and sialic acid  
195 content. Protein content was determined using a BCA Protein Assay kit (Thermo Scientific),  
196 according to manufacturer's directions. Sialic Acid was quantified using the Sialic Acid  
197 Quantitation Kit (Sigma), according to manufacturer's directions.

198 The carbohydrate composition of the CPS was characterized by GC-MS as previously  
199 detailed in Brunson et al (20). Briefly, CPS was purified from LPS using sodium deoxycholate at  
200 a final concentration of 6 mM as described by Kachlany et al. (21). The CPS was pelleted with  
201 cold ethanol, then freeze-dried before being hydrolyzed in 0.5 M HCl at 85°C for 18 h. The  
202 hydrolyzed carbohydrates were modified with the Tri-Sil HTP reagent (Thermo Scientific,  
203 Wltham MA.), as described by York et al. (22). The modified carbohydrates were dried and  
204 resuspended in 1 mL hexane. The carbohydrate suspension in hexane was centrifuged at 1000 x  
205 g for 5 minutes and the supernatant was collected for GC-MS analysis.

206 GC-MS analyses were conducted with a CP-3800 GC (Varian, Palo Alto, CA.) using a  
207 Supelco SPB-608 30-m fused silica capillary column, containing a bonded stationary phase (0.25  
208 µm film thickness). The TMS (tri-methyl silyl) conjugated glycans were analyzed using the

209 electron ionization mode with a Saturn 2200 GC/MS (Varian, Palo Alto, CA.). The initial oven  
210 temperature was 80 °C, held for 2 min. Then, the temperature was raised by 20°C/min and held  
211 at 160°C for 12 min. Finally, the oven temperature was raised by 20°C/min and held at 260°C for  
212 7 min.

### 213 **Quantification of Lipopolysaccharide:**

214 Whole cell lipopolysaccharide levels were quantified using the Purpald assay (23, 24).  
215 Briefly stated, cultures were centrifuged at 5,000 rpm for 5 minutes and re-suspended in PBS. 50  
216 µL of this cell solution was treated with 32 mM sodium periodate solution in a 96-well plate and  
217 incubated at room temperature for 25 minutes. After this incubation period, a 136 mM Purpald  
218 solution in 2N NaOH was added, and the plate was incubated for an additional 20 minutes.  
219 Following the completion of this step, 64 mM sodium periodate solution was added, and the  
220 plate was incubated for 20 minutes. Absorbance was immediately determined at 540 nm and  
221 compared to a standard curve of pure lipopolysaccharide isolated from *K. pneumoniae* (Sigma.  
222 St. Louis MO.). This assay was also used for capsule extracted as described above for the  
223 glucuronic acid assay. Results are presented with LPS concentrations normalized to 10<sup>8</sup> CFUs.

### 224 **Statistical Analysis**

225 Statistical significance was determined using a one-way ANOVA and Tukey's post hoc  
226 test using XLSTAT software. Significance for the D-glucuronic acid and protein quantification  
227 was compared against results from the time zero, untreated sample. Significance was determined  
228 at a p value of  $\leq 0.01$  or less.

229

## 230 **Results**

### 231 **Experimental design of progressive sub-MIC exposure to cephalothin**

232 This study aimed to evaluate the adaptive genetic changes in *Klebsiella pneumoniae*  
233 43816 upon prolonged but increasing exposure to sub-MIC levels of the common antibiotic  
234 cephalothin. *Klebsiella pneumoniae* 43816 was utilized because *Klebsiella* is known for its  
235 genomic plasticity and rapid evolution of antibiotic resistance (25, 26). Additionally, the genome  
236 of this strain has been sequenced (15), which allows for genetic changes to be tracked over the  
237 course of the progressive exposure.

238 The experimental design of this exposure protocol is diagramed in Figure 1. Fresh  
239 cultures were grown in LB at 37C with 200 rpm shaking and an initial cephalothin concentration  
240 of 0.5 µg/mL. After the first 12 hours of culture, a sample was transferred to fresh LB with the  
241 same antibiotic concentration and allowed to grow for a second 12-hour period. The bacteria  
242 were exposed to any one dose of antibiotics for 24 hours in total. Then, the sample was  
243 transferred to a culture with an increased concentration of antibiotic. At each step, the antibiotic  
244 concentration was increased by 0.5 µg/mL, to a final exposure of 7.5 µg/mL, which was well  
245 below the CLSI standard of 16 µg/mL for cephalothin resistance (27). As a control, an untreated  
246 culture, without antibiotics, was grown and transferred in parallel to LB without any antibiotic.  
247 Frozen stocks were made of all cultures at each 12-hour timepoint and saved for later analysis.

### 248 **Progressive antibiotic exposure alters *K. pneumoniae* growth, cellular morphology, and** 249 **colony morphology**

250 In order to evaluate the impact of such low antibiotic concentrations, we measured the  
251 rate of growth of the culture at the 12-hour transfer mark. This was determined by measuring the

252 time it took from the culture to reach an optical density (OD<sub>600</sub>) of 1.0 after subculturing. As seen  
253 in Table 1, the cultures exposed to antibiotics exhibited slower growth (time to OD 1.0), which is  
254 indicative of cellular stress. The growth rate of the treated culture was substantially slowed once  
255 antibiotic concentrations exceeded 5 µg/mL; while the growth rate of the untreated culture was  
256 not significantly affected over the entire course of the experiment.

257 This slow growth rate was not a permanent effect, as demonstrated by the growth  
258 properties of the final adapted culture (Table 1). The final adapted culture was able to grow  
259 rapidly in 7.5 µg/mL cephalothin (time to OD<sub>600</sub> 1.0). This was similar to the times recorded for  
260 the untreated culture at any time point during the fourteen days of continuous growth in LB.

261 While the growth rates of the adapted culture returned to a range similar to the untreated  
262 culture, the appearance of the antibiotic treated culture was significantly and permanently altered  
263 after the progressive exposure experiment. The antibiotic adapted culture exhibited a highly  
264 mucoid appearance in liquid culture when compared to the clonally related untreated group  
265 (Figure 2A). While the viscosity changed, the adapted population did not qualify as a  
266 hypermucoviscous strain as indicated by a string test (data not shown).

267 Differences were also observed in cellular and colony morphology. The antibiotic  
268 exposed culture resulted in cells with a greatly elongated, filamentous structure (Figures 2B and  
269 2C). Quadrant streaking of the final antibiotic adapted culture resulted in two consistent colony  
270 morphologies, designated small and large colonies (Figure 2D). Bacteria were isolated from  
271 either the large or small colonies and resuspended in liquid culture. When replated separately,  
272 they only produced small or large colonies that corresponded to morphology of the original

273 colony (data not shown). The persistence of these phenotypes after isolation indicated that the  
274 morphological change was heritable.

### 275 **Progressive antibiotic exposure induces clinical resistance to multiple classes of antibiotics**

276 Changes in the minimum inhibitory concentration (MIC) of several different classes of  
277 antibiotic were determined by the broth microdilution assay (Table 2). The concentration of  
278 antibiotic that halts all growth (MIC breakpoint) was determined for tetracycline, amikacin, and  
279 five different beta-lactam antibiotics (Cephalothin, Cefoxitin, Cefotaxime, Cefepime, and  
280 Imipenem). The beta-lactam drugs were chosen as representative of different generations of  
281 cephalosporin antibiotics and a carbapenem, respectively. Clinical resistance was determined  
282 using CLSI breakpoints (27).

283 As seen in Table 2, the fourteen-day growth of cells without antibiotics did not greatly  
284 impact the MIC values against the antibiotic tested. The MIC values in the fourteen-day  
285 untreated cells were not as substantially elevated as the MIC values observed in the fourteen-day  
286 adapted cells when compared to the day 0 control (Table 2). Overall, the untreated cells did not  
287 reach MICs above the CLSI cutoff for clinical resistance for any of the antibiotics tested unlike  
288 the fourteen-day adapted cells. The adapted culture exhibited highly elevated MICs to  
289 cephalothin, which was used for the progressive exposure experiment. This culture exhibited  
290 clinical resistance to cephalothin and cefoxitin as determined by CLSI breakpoints. Cephalothin  
291 and cefoxitin are first- and second-generation cephalosporin antibiotics, respectively. MICs to  
292 later generation cephalosporins and the carbapenem antibiotic were slightly elevated in both the  
293 fourteen-day untreated and adapted cells, but the MICs for each were still below the CLSI cutoff.  
294 To fully evaluate the impact of progressive sub-MIC cephalothin exposure, antibiotics with  
295 different cellular targets than the beta-lactams were also tested. Progressive exposure had little

296 impact on the breakpoint value for the aminoglycoside antibiotic amikacin, but clinical resistance  
297 to tetracycline was achieved. These data indicate that progressive exposure to cephalothin at only  
298 half the MIC cutoff concentration (27), led to resistance to a second generation of cephalosporin  
299 in addition to an antibiotic in another class.

300         Additionally, MIC breakpoints were determined for the two isolated colony  
301 morphologies from the final antibiotic adapted culture. Both the small and large morphologies  
302 exhibited clinical resistance to cephalothin and cefoxitin, with the large colonies exhibiting  
303 highly elevated MICs to cephalothin; which was well above the MIC observed for both the small  
304 and adapted final culture. Both isolates also exhibited elevated MICs to tetracycline; but were  
305 more sensitive than the mixed day 14 adapted culture. Amikacin MICs were not significantly  
306 changed in either phenotype. Taken together, these data demonstrate that progressive sub-MIC  
307 concentrations of a single antibiotic provide sufficient evolutionary pressure to drive the  
308 evolution of clinical levels of resistance to multiple generations of beta-lactams as well as classes  
309 of antibiotics with different cellular targets.

### 310 **Whole genome sequencing reveals distinctive genetic changes because of progressive** 311 **antibiotic exposure**

312         To determine the genetic changes responsible for this antibiotic resistant mucoid  
313 phenotype, DNA was extracted from bacterial stocks of each day of the progressive antibiotic  
314 exposure and sequenced by the Microbial Genome Sequencing Center using an Illumina  
315 sequencing method and a proprietary statistical algorithm for variant calling  
316 ([www.seqcenter.com](http://www.seqcenter.com)) (16). This methodology resulted in a surprisingly low number of SNPs  
317 identified, in part because it does not analyze changes to non-coding regions of the genome, such  
318 as promoters.

319 To confirm these results and to extend our analysis to include SNPs within promoter  
320 regions, DNA from the fourteen-day adapted and untreated *K. pneumoniae* 43816 cultures were  
321 also analyzed using SMRT Cell Sequencing by the National Center for Genome Resources  
322 ([www.ncgr.org](http://www.ncgr.org)). Together these analyses identified 107 mutations in the control culture and 29  
323 mutations in the genome of the antibiotic treated culture. Of the 29 mutations identified in the  
324 adapted strain, 15 were nonsynonymous changes that occurred in protein-coding regions of the  
325 sequence. To further refine the list of potential targets, any mutations shared with the untreated  
326 population of bacteria were removed. Comparing the genomes highlighted seven protein coding  
327 genes which were altered in the final antibiotic adapted cells (Table 3). Changes to *rpoB*,  
328 *tetR/acrR*, *wcaJ*, and *gndA* were identified using both sequencing methodologies (Table 4).

329 Notably, none of the identified mutations by either methodology were identified in  
330 penicillin binding proteins or other cell wall modification genes highly associated with  
331 traditional beta-lactam resistance. Genes with identified mutations were searched against the  
332 CARD data base and using the *amrFinder* bioinformatics tool ([card.mcmaster.ca](http://card.mcmaster.ca)) (28)(29).  
333 Neither of these analyses identified these genes as being previously identified as resistance  
334 mechanisms to beta-lactams. The *tetR/acrR* gene resulted in a match for the wildtype version of  
335 the gene as being associated with tetracycline resistance, while *rpoB* matched for rifamycin  
336 resistance (30). This analysis indicates that the majority of these modifications and gene targets  
337 are novel or not previously characterized in terms of their impact on antibiotic resistance.

338 The only mutations that were not 100% fixed in the population at the conclusion of the  
339 fourteen-day progressive exposure were nucleotide substitutions in the coding region of the  
340 SGNH/GDSL hydrolase family protein and a deletion in the promoter of SGNH/GDSL (Table  
341 3). This may be linked to the emergence of the small and large colony variants. Other genetic



342 changes that were fixed by the fourteen day endpoint include deletions in the coding regions of  
343 the following: N-acetyltransferase, ABC transporter, ATP binding protein, and DNA  
344 recombination protein (RmuC). Additionally, a substitution in the coding region of  
345 undecaprenyl-phosphate glucose phosphotransferase was discovered. An insertion was found in  
346 a globin coding sequence and a large insert in the *tetR/acrR* transcriptional regulator resulted in  
347 an early stop codon. The functions of these genes encompassed cellular processes of signal  
348 transduction, energy and metabolite use, capsule formation, and nucleic acid proofreading.

349 In addition to changes in the coding regions of those genes, six unique mutations were  
350 identified in promoter regions of five other genes that were fixed in the adapted population  
351 (Table 3). Promoter regions were defined as occurring within 150 bp of a protein coding start  
352 site. Synonymous mutations between the untreated and adapted cultures were removed as  
353 described above. With exception to SGNH/GDSL, all other genetic changes in promoter regions  
354 were fully fixed in 100% of the DNA sampled. Not all genes associated with these promoters  
355 have been fully characterized in *Klebsiella pneumoniae*. In those cases, the data about the class  
356 of each gene and close homologues is presented. Functions of the coding regions encompassed  
357 cell metabolism, signal transduction, and mRNA proofreading.

### 358 **Genome sequencing allows for correlation of genetic changes with increased MICs**

359 The Illumina sequencing of the cultures from each day of the experiment allowed us to  
360 map the timepoint of 100% fixation of mutation with significant increases in MIC, and changes  
361 in growth rates. For this we focused on those mutated genes (*rpoB*, *tetR/acrR*, *wcaJ*, and *gndA*)  
362 identified using both sequencing methodologies (Table 4).

363 As seen in Figure 3, the emergence of clinical tetracycline resistance can be matched with  
364 fully fixed alterations in *rpoB*, and large increases in the cephalothin MICs can be correlated  
365 with fixed changes to *tetR/acrR*, and *wcaJ*. The large increase in cephalothin MIC associated  
366 with *wcaJ* can also be mapped to the significant slowing of growth of all treated cultures when  
367 exposed to 5 µg/ml of drug (Table 1).

368 Two separate sets of sequence changes in *wcaJ*, and *gndA* were identified using the  
369 Illumina methodology (Table 4). The final adapted culture, which is composed of a mix of large  
370 and small colony morphologies, identified sequence changes with only 64% genome coverage.  
371 When the two morphologies were sequenced separately, a large deletion that impacted both  
372 genes was found in only the small colony variant.

373 Both the large and small colony variants had mutations in the *rpoB* and *tetR/acrR*  
374 transcriptional regulator sequences. The mutation in *rpoB* was 100% fixed in both variants.  
375 However, the depth of coverage of the *tetR/acrR* transcriptional regulator in the large colony  
376 variant was only 52%. The large colony variant also had a distinguishing marginal mutation call  
377 in a *comEC* family protein that was not found in the small colony variant. The small colony  
378 variant exhibited an additional SNP in a *yfiR* family protein that was not identified in the large  
379 colony variant. All the mutations in the small colony forming variant were 100% fixed indicating  
380 a more homogenous genomic identity than the large colony forming subpopulation.

### 381 **Genetic changes in progressive antibiotic adapted cultures are associated with alterations** 382 **to capsule and LPS**

383 The final adapted culture from this progressive antibiotic exposure experiment exhibited  
384 a highly mucoid phenotype indicating that capsule production or composition may be altered.

385 Genome sequencing then identified alterations to *wcaJ*, which is part of the capsule *cps* operon  
386 and initiates production of colanic acid (31). Therefore, we hypothesized that alterations to  
387 capsule production and composition may be directly related to the emergence of high  
388 concentration cephalothin resistance.

389 To investigate changes in the capsule, extracellular polysaccharide was extracted and  
390 quantified by the uronic acid assay. As can be seen in Figure 4A, capsule polysaccharide  
391 increases until the fixation of the *tetR/acrR* mutation and emergence of clinical cephalothin  
392 resistance. All samples after this point exhibited capsule polysaccharides at levels similar to or  
393 slightly below those produced by the untreated control culture.

394 Given that the uronic acid assay only detects one sugar moiety within the capsule  
395 polysaccharide, other possible components of the capsule were investigated. Extracted capsule  
396 from untreated and adapted cultures were found to contain similar levels of sialic acids ( $2.5 \pm 1.2$   
397 nmoles/ $10^8$  CFU in untreated culture vs  $2.9 \pm 1.8$  nmoles/ $10^8$  CFU in final adapted culture),  
398 which is associated with increased virulence (32). Adapted capsule extracts also exhibited  
399 reduced total protein content as determined by BCA assay (Figure 4B). Both the reduced  
400 glucuronic acid and protein emerged concurrently with the alterations in the *tetR/acrR* gene.  
401 Finally, capsule extract was analyzed by GC/MS to identify new peaks indicative of changes to  
402 the sugar composition (Figure 4C). No new peaks were identified indicating that novel  
403 carbohydrate changes are not directly associated with the antibiotic resistant phenotype.

404 To determine the relationship between alterations in capsule and antibiotic resistance, we  
405 tested a  $\Delta wcaJ$  strain of *Klebsiella pneumoniae* 43816 for altered MICs. This deletion has been  
406 previously characterized as significantly reducing capsule uronic acid content and mucoviscosity  
407 (12). As seen in Table 2, deletion of this gene does result in increases in MIC breakpoints to both

408 cephalothin and cefoxitin. These increases are to the level of the breakpoint value. This data  
409 indicates that cps modification can have a significant impact on antibiotic susceptibility in  
410 *Klebsiella*. However, the high-level clinical resistance seen in our fully adapted strain is likely  
411 due to the combination of multiple gene alterations, including those within the cps operon.

412 Colanic acid, which is synthesized in part using the *wcaJ* gene product, is also associated  
413 with lipopolysaccharide. Therefore, we determined the LPS content of both bacterial cells and  
414 extracted capsule using the Purpald assay. LPS content was significantly elevated in both the cell  
415 and extracted capsule of the adapted strain as compared to the control (Figure 5). This elevated  
416 LPS content may indicate a high level of outer membrane turnover in the adapted culture  
417 associated with alteration in *wcaJ*.

418

## 419 Discussion

420 The goal of this study was to characterize the impact of low concentration antibiotic  
421 exposure on the evolution of bacterial resistance. A progressive exposure model was used, in  
422 which *Klebsiella pneumoniae* was exposed to slowly increasing sub-MIC concentrations of the  
423 antibiotic cephalothin. The final resulting culture had been exposed to a maximum antibiotic  
424 concentration of 7.5 µg/mL cephalothin. This final culture exhibited full clinical resistance to  
425 first and second generation cephalosporins, with MIC values far exceeding the CLSI breakpoint.  
426 Additionally, the final culture had increased MICs to tetracycline, a highly mucoid appearance,  
427 and an elongated cellular morphology. Genome sequencing revealed a series of genetic  
428 alterations that could be mapped directly to the emergence of the resistant phenotype. Changes in  
429 phenotype and genetic alterations both indicate that alterations in the *tetR* regulator, LPS  
430 shedding, and capsule colanic acid synthesis may be directly associated with the resistance  
431 phenotype.

432 The three resistance-correlated mutations occurred in genes *rpoB*, *tetR/acrR*, and *wcaJ*.  
433 The increases in resistance occurred in a stepwise manner, similar to the increases in fitness  
434 observed in *E. coli* long-term evolution (LTEE) experiments (33–35). LTEE studies also  
435 provided estimates for the rapidity of mutation fixation in a constant environment. The *E. coli*  
436 population in the LTEE experiments accumulated 20 mutations in the first 10,000 generations of  
437 growth with a few rapid mutations that reached fixation in the population within 100 generations  
438 (34, 35). The three resistance-correlated mutations in this present study all fixed within 36-378.9  
439 generations using a generation time estimate from a related *K. pneumoniae* strain of 38-40  
440 minutes (36). Despite the use of incremental exposures to cephalothin in this study, we find that

441 these mutations occurred rapidly in *Klebsiella pneumoniae* similar to what others have reported  
442 for *E. coli*.

443 The speed with which these three mutations were acquired also indicates that the sub-  
444 MIC concentration of cephalothin in the growth environment provides significant selective  
445 pressure. After only 24 hours of exposure, the resistance of the adapted population to tetracycline  
446 had the first jump from 1  $\mu\text{g/mL}$  to 8  $\mu\text{g/mL}$ , which correlated with a fixed mutation in *rpoB*.  
447 The rapidity of fixation and correlated increase in survivability suggest that this mutation  
448 conferred a very high fitness advantage. It is possible that a necessary step in acquiring resistance  
449 for this population was mutation in a gene meant to monitor nucleic acid integrity, allowing for  
450 further alterations to the genome.

451 The selection window hypothesis holds that sub-MIC level antibiotic exposure should  
452 generally increase bacterial mutation rates (7, 8) because higher mutation rates will improve the  
453 chances of generating adaptive genetic change that provides a fitness advantage in conditions of  
454 antibiotic stress. Methodologies employed by studies testing this theory have generally identified  
455 “mutants” by plating samples of a bacteria exposed to an antibiotic on media inoculated with  
456 some other antibiotic substance (4, 9). Mutation rates analyzed using this methodology tend to  
457 indicate that lower antibiotic concentrations result in high mutation rates that decline as the  
458 concentration of antibiotic nears the MIC (9, 37). However, when whole-genome analysis is  
459 incorporated along with mutation accumulation analysis, substitutions and insertions/deletions  
460 increased in frequency as exposure to antibiotic increased in *E. coli* (38). Additionally, the rate of  
461 mutation in known resistance genes tracked in *P. aeruginosa* isolates generated conflicting  
462 results (11).

463           The present study utilized whole genome sequencing to identify mutations across the  
464 genome for the antibiotic-treated and unexposed sample after 14 days of total treatment. This  
465 data showed a higher number of mutations in the untreated sample compared to the adapted  
466 cohort. As noted by Long et. al., a true mutation accumulation analysis that determines the  
467 frequency of genetic polymorphism per generation would require repeatedly passing a bacteria  
468 through bottlenecks to mitigate any selective influences (38). The fact that the adapted  
469 population in this study was maintained as a whole group when sub-cultured may affect the  
470 relative number of mutations identified by whole genome sequencing. Another factor at work is  
471 that the treatment concentration of cephalothin did surpass the MIC of 4.0 µg/ml of the original  
472 *K. pneumoniae* 43816 for over half of the adaptation period (Tables 1 and 2). Both the selection  
473 window hypothesis and adaptive studies of bacterial mutation would suggest that such a high  
474 concentration would decrease mutation rates compared to an unexposed cohort and explain the  
475 low number of identified polymorphisms (4, 7–9, 37).

476           The *rpoB* mutation identified by Illumina sequencing early in the exposure regimen is  
477 very close to an alteration detected in the *rmuC* DNA recombination protein in the final sample  
478 sequenced using the SMRT cell method. The mutations identified do not all match between both  
479 sequencing methods, nor are the calls for similar genes found in the exact same position or using  
480 the same base changes (Tables 3 and 4). This could reflect differences in methodology, genome  
481 construction in the two methods, and/or inherent error. These results highlight the limitations of  
482 using just one sequencing methodology for this type of analysis. Recent work has suggested that  
483 both long-read methods, like SMRT cell sequencing, and short-read methods, like Illumina  
484 sequencing, be combined for a hybrid approach for the most accurate formation of novel  
485 sequences especially those of the *Enterobacteriaceae* family (39). The data from both rounds of

486 sequencing found that the SMRT cell method identified more polymorphisms in the adapted  
487 population genome and was able to identify mutations in noncoding regions unlike the Illumina  
488 method. Additionally, the evolution of a resistant phenotype can require cooperative mutations  
489 adding difficulty to the present study's ability to directly trace the effects of one mutation to a  
490 quantifiable change in antibiotic survival (37).

491         The protein products of both *rpoB* and *rmuC* interact closely with genomic DNA. RmuC  
492 is a regulator which can prevent sequence inversion during replication (40). RmuC has also been  
493 identified as a possible multidrug resistance (MDR) gene in other Gram-negative bacterial  
494 species (41, 42). However, RpoB is part of the RNA polymerase protein complex and when  
495 mutated can inhibit the action of rifamycin in bacteria (30). Mutations in *rpoB* have been linked  
496 to rifamycin resistance in *E. coli* (43, 44), and has been identified as a resistance gene in various  
497 other classes of bacteria (45). Additionally, an early mutation in a gene tied to nucleic acid  
498 integrity provides a possible mechanism for further evolution of resistance by increasing the  
499 occurrence of replication error mutations in progeny.

500         TetR regulators are global multi-target transcriptional regulators that affect multiple  
501 processes within the cell beyond just efflux pumps (43, 44). Members of this family of regulatory  
502 proteins have been shown to impact a variety of virulence associated targets including motility,  
503 biofilm formation, and osmotic tolerance (46). One member of this family has been directly  
504 associated with *ftsZ*, which is known to regulate cell division and bacillus cellular morphology  
505 (47). Therefore, it is reasonable for a mutation in a *tetR* type regulator to impact cellular functions  
506 and resistance to classes of antibiotics other than tetracycline.

507         Other studies on the *in vivo* evolution of *Klebsiella* within a patient undergoing antibiotic  
508 therapy have further identified TetR family upstream regulators of porins as being associated with



509 clinical resistance. Yoshino et. al, tracked the evolution of a clinical isolate of *Klebsiella* through  
510 treatment with multiple classes of antibiotics. They identified porin loss as a result of mutations in  
511 the *ramR*, a TetR family transcriptional regulator of *micF*, the an antisense RNA regulator of the  
512 *ompK35* porin (48). The ultimate result of this *ramR* mutation was loss of the OmpK35 porin,  
513 limiting entry of beta-lactam antibiotics into the periplasmic space. These data indicate that  
514 antibiotic resistance can be achieved through mutations in a number of different genes in a given  
515 pathway. In a sub-MIC exposure to drug, it may even be advantageous for mutations to occur in  
516 regulator proteins rather than negatively impacting the primary function of a porin or another  
517 endpoint enzyme.

518         None of the identified mutations were found in penicillin binding proteins or other cell wall  
519 modification pathways that are highly associated with traditional beta-lactam resistance. The data  
520 presented here adds to a number of other recent studies that are identifying the role of a broad array  
521 of genes and cellular functions as being involved in the bacterial response and survival during  
522 antibiotic exposure. In addition to regulators of porins and cell wall regulators, Lopatkin *et. al* have  
523 identified core metabolic mutations that mitigate antibiotic susceptibility in clinical isolates (49).  
524 Together these findings all support the need for broader investigations of gene alterations that  
525 contribute to resistance than those traditionally classified as such.

526         It is interesting that such a large insert and formation of a stop codon would be found in  
527 *tetR/acrR*, a gene known for resistance to tetracyclines, when exposed to a beta-lactam. However,  
528 the development of cross resistance among bacterial populations exposed to one class of antibiotic  
529 is not uncommon. Exposure to environmental chemicals such as surface antiseptic chlorhexidine,  
530 or veterinary antibiotics tilmicosin and florfenicol have been shown to create cross-resistance in  
531 human pathogens to different classes of antibiotics (3, 5).

532           The genetic alterations associated with the largest increase in beta-lactam resistance were  
533 mapped to two adjacent genomic locations. The SMRT method identified an uncharacterized  
534 undecaprenyl phosphate-glucose phosphotransferase, which is very close to the mutation found  
535 in *wcaJ* by Illumina sequencing (Tables 3 and 4). The second round of sequencing specified that  
536 there was a large deletion encompassing the end of the *wcaJ* and beginning of the *gndA* genes  
537 which was exclusive to the small colony forming subpopulation.

538           In *Klebsiella pneumoniae*, *wcaJ* is part of the capsular *cps* operon and initiates production  
539 of colanic acid (31, 50). Absence of *wcaJ* has been linked to increased resistance to phage  
540 treatment, decreased virulence in murine models, and increased phagocytosis by macrophages  
541 (31). Studies ablating *wcaJ* in *Klebsiella pneumoniae* result in a nonmucoid phenotype while  
542 increasing biofilm production and increasing resistance to polymyxin (12)(50).

543           Our observation of altered cellular morphology may be related to envelope stress and  
544 remodeling involving enzymes such as WcaJ. This elongated morphology has been demonstrated  
545 in experiments using high doses of beta-lactams to be a signature event in the process of drug  
546 induced cellular lysis (51). However, other studies of beta-lactam exposure have documented the  
547 permanent formation of filamentous bacterial cells (52). Additionally, Kessler *et. al*  
548 demonstrated altered cell shape in *E. coli wcaJ* knockouts that exhibited accumulation of  
549 periplasmic colanic acid precursors and activation of the Rcs osmotic stress response pathway  
550 (53). New studies indicate that changes in cellular shape and the surface area to volume ratio can  
551 be part of an overall bacterial stress response to antibiotics (54). Our results, which only used  
552 sub-MIC concentrations of beta-lactams, indicate that these stress responses alone can result in  
553 permanent changes to cellular morphology that may play a larger role in bacterial survival.

554 Colanic acid polymers, synthesized using the *wcaJ* gene product, can be covalently  
555 linked to lipopolysaccharides (55). We observed increased LPS content in our extracted capsule  
556 polysaccharides, indicating that the *wcaJ* mutation may trigger increased membrane turnover.  
557 The ability to synthesize LPS O-antigen sugars has been documented to directly impact colanic  
558 acid synthesis (56). It is therefore reasonable to hypothesize that alterations in *wcaJ* may  
559 likewise impact LPS synthesis, modification, and turnover. Studies of more general osmotic  
560 stress indicate the possibility of a shift from O-antigen attachment to colanic acid attachment  
561 (55). These changes may directly impact overall membrane permeability and the ability of beta-  
562 lactams to access the periplasmic space.

563 At low antibiotic concentrations, these modifications in membrane composition and  
564 permeability may be sufficient for bacterial survival. This idea is supported by our analysis of  
565 MIC breakpoints to cephalosporins from multiple different generations. The multiple generations  
566 of cephalosporin antibiotics are classified in large part based on molecular modifications that  
567 extend the spectrum of activity against gram-negative aerobic bacilli such as *Klebsiella* (57). We  
568 observed increased MICs to first and second, but not later generation cephalosporins in both our  
569 adapted strain and the  $\Delta wcaJ$  strain. These later generation drugs, as well as carbapenems have  
570 been modified to enhance permeability through the Gram-negative outer membrane. These data  
571 indicate that the mutations generated by our adapted strain may have directly impacted outer  
572 membrane permeability by a mechanism other than porin loss.

573 Together, these data indicate that low level beta-lactam exposure initiates a cascade of  
574 modifications to the outer envelope and capsule polysaccharides that warrants further  
575 investigation. Studies examining single knockouts of *tetR* did not find associated changes in  
576 beta-lactam MICs (46). While we observed increases in the MICs in the  $\Delta wcaJ$  strain of

577 *Klebsiella pneumoniae* 43816, Kessler et al. did not when using a knockout of the same gene in  
578 *E. coli* (53). This may be related to the more complex nature and function of the capsule in  
579 *Klebsiella*. Mutations in *rpoB* have been associated with beta-lactam resistance, but not  
580 resistance to multiple classes of antibiotics (58). It is therefore highly likely that a combination of  
581 multiple mutations is required to achieve the multi-drug resistant phenotype observed in this  
582 experiment.

583 Our final adapted culture represented a heterogeneous mixture of two colony  
584 morphologies, which was reflected in the genome sequence analysis. The deletion spanning  
585 between *wcaJ* and *gndA* only occurred in the small colony forming population. As noted above,  
586 ablation of *wcaJ* in *K. pneumoniae* is linked to a decrease in species mucoidy and increased  
587 sensitivity to polymyxin. Similarly, *gndA* is a gene within the *cps* locus responsible for the K2  
588 serotype and capsule formation of *K. pneumoniae* (59, 60). It therefore seems likely that the  
589 mucoid phenotype seen in the fourteen-day adapted population whole-group mixture is due to  
590 the large colony subpopulation only. This is supported by the fact that the small colony  
591 subpopulation has a reduced resistance to cephalothin compared to the large colonies which have  
592 an intact *wcaJ* sequence.

593 This study also demonstrates the complexity of changes occurring within what can be  
594 characterized as a single culture study. Multiple mutations occur within different cells in this  
595 population over time, resulting in a heterogeneous, non-clonal population. As compared to  
596 studies such as the LTEE (33–35), we have added the directional pressure of sub-MIC antibiotic  
597 exposure, and prevented the acquisition of new resistance genes from other nearby bacterial  
598 species, such as might be found with a patient. Tracking the *in vivo* evolution of clinical isolates  
599 has been used to demonstrate the evolution of resistance by a single *Klebsiella* isolate to colistin

600 (61), carbapenems (62) and beta-lactams (48, 63). However, these studies often focus primarily  
601 on the acquisition of genes by horizontal gene transfer, and only recently have identified  
602 mutations in other pathways as playing a significant role (54)(49) in bacterial survival within the  
603 antibiotic treated host. Larger scale studies, using multiple cultures provided the same antibiotic  
604 exposure in parallel are ongoing to investigate how many different paths and mutations may be  
605 used to ensure bacterial survival.

606         In summary, this progressive, sub-MIC antibiotic exposure experiment resulted in a  
607 mixture of bacteria exhibiting multiple genomic changes. The multiple isolates from this  
608 experiment resulted in bacteria that were resistant, rather than tolerant of the antibiotic, as they  
609 exhibited normal metabolic activity and growth in the presence of the antibiotic (64). While both  
610 the large and small variant isolates exhibited elevated MICs to cephalothin, the mixture of these  
611 isolates demonstrated a synergistic protective effect. This mixture is reflective of what would  
612 occur in the environment, where individual cells may independently evolve, persist, or assist in  
613 the survival of nearby cells. The bacteria in this study achieved clinical resistance without the  
614 traditional acquisition of a beta-lactamase gene. These compensatory mutations, and  
615 combinations of them, warrant further investigation as they may accelerate and enhance  
616 resistance associated with traditional horizontal gene transfer.

617

618 **Funding and Acknowledgements**

619           This research was supported by funding from UNF to T.N.E., including a Dean’s Council  
620 Fellowship Award, a Research Enhancement Plan Award, and the Transformational Learning  
621 Opportunity Program. We thank Frank Smith for assistance with bioinformatics software, and all  
622 members of the Ellis lab for thoughtful input and comments.

623

624 **Figure Legends:**

625 **Figure 1: Experimental design.** *Klebsiella pneumoniae* 43816 was exposed to increasing  
626 concentrations of cephalothin in LB media over a continuous 14-day period. All cultures were  
627 grown in LB media at 37C with 200 rpm shaking. Each single dose exposure lasted 24 hours and  
628 included a sub-culture into fresh media with antibiotics at the 12-hour mark. Frozen bacterial  
629 stocks were made every 12 hours for subsequent analysis. A control culture was also grown, sub-  
630 cultured, and sampled in LB media without antibiotics following the same schedule as the treated  
631 sample.

632

633 **Table 1: Changes in growth rates because of low dose antibiotic exposure.** The initial impact  
634 of sub-MIC antibiotic exposure was determined by evaluating the growth rate of cultures upon  
635 transfer to a new antibiotic concentration. Measurement of time required for adapted and  
636 untreated *K. pneumoniae* 43816 sub-culture to reach an OD<sub>600</sub> of 1.0 was measured after 12-hour  
637 exposure at each time point/dose. Changes in growth between treated and control was  
638 determined relative to the average growth time for all untreated cultures (142 minutes). Values in  
639 bold represent increases in growth time greater than one half that of the untreated culture.

640

641 **Figure 2: Changes in cell, liquid culture, and colony morphology because of antibiotic**  
642 **exposure.** A) Broth culture appearance of untreated and antibiotic exposed culture at end point  
643 of the 14-day experiment (after 12 hours of growth) exhibits increased mucoid layer in antibiotic  
644 treated culture. Cell morphology of untreated culture (B) and antibiotic exposed culture (C) was  
645 determined by negative staining with nigrosin at 1000x magnification. Antibiotic exposed cells

646 (C) exhibit an elongated cell morphology. D) Quadrant streaking on LB of the final adapted  
647 culture revealed two colony morphologies.

648

649 **Table 2: Changes in minimum inhibitory concentration (MIC) breakpoints of *K.***  
650 ***pneumoniae* 43816 cultures after progressive low dose exposures.** Broth microdilution assays  
651 (n=3) determined the minimum inhibitory concentration breakpoint of multiple antibiotics for  
652 endpoint cultures, the  $\Delta wcaJ$  strain, and endpoint colony morphology isolates. \* indicates values  
653 that exceed the CLSI breakpoint for clinical resistance. \*\* indicates values that meet the CLSI  
654 breakpoint for clinical resistance (27).

655

656 **Table 3: Non-synonymous single nucleotide polymorphisms and genomic changes identified**  
657 **in the final adapted culture.** SMRT Cell genomic sequencing was used for whole genome  
658 sequencing. The genome sequence of *K. pneumoniae* 43816 was used as the reference genome.

659

660 **Table 4: SNPs and genomic changes identified in large and small colony subpopulations of**  
661 **14 day adapted culture.** Illumina genomic sequencing was used for sequencing of colony  
662 subpopulations. The genome sequence of *K. pneumoniae* 43816 was used as the reference  
663 genome.

664

665 **Figure 3: MIC breakpoints map to onset of clinical resistance and fixation of genomic**  
666 **changes.** Broth microdilution assays (n=3) determined MIC breakpoints to tetracycline and  
667 cephalothin of cultures over the entire 14-day progressive exposure. Arrows indicate jumps



668 above clinical resistance breakpoint and fixation of specific genetic changes as identified by  
669 whole genome sequencing.

670

671 **Figure 4: Onset of clinical resistance coincides with changes in quantity and composition of**  
672 **capsule.** Capsule polysaccharides were extracted from cultures from each treatment of the  
673 experiment. The extracted capsule was then analyzed for A) Total capsule production as  
674 quantified by glucuronic acid; and B) Protein content of extracted capsule quantified by BCA  
675 protein assay. N=6 for both assays,  $* = \leq 0.01$  by one way ANOVA compared to untreated  
676 control. C) GC-MS analysis of the carbohydrate composition of capsules extracted from  
677 untreated and adapted cultures.

678

679 **Figure 5: Lipopolysaccharide content of capsule and cells is increased after progressive**  
680 **sub-MIC exposure.**

681 Capsule polysaccharides were extracted from untreated and final adapted cultures. Capsule and  
682 whole cells LPS content was determined by the Purpald Assay. N=6,  $* = \leq 0.001$  by one way  
683 ANOVA compared to untreated control.

684

## 685 **References**

- 686 1. Polianciuc SI, Gurzău AE, Kiss B, Georgia Ștefan M, Loghin F. 2020. Antibiotics in the  
687 environment: causes and consequences. *Med Pharm Reports* 93.
- 688 2. 2015. National Action Plan to Combat Antibiotic-Resistant Bacteria.
- 689 3. Kampf G. 2016. Acquired resistance to chlorhexidine – is it time to establish an ‘antiseptic  
690 stewardship’ initiative? *J Hosp Infect.*
- 691 4. Nair CG, Chao C, Ryall B, Williams HD. 2013. Sub-lethal concentrations of antibiotics  
692 increase mutation frequency in the cystic fibrosis pathogen *Pseudomonas aeruginosa*. *Lett*  
693 *Appl Microbiol* 56.
- 694 5. Singh AK, Bhunia AK. 2019. Animal-Use Antibiotics Induce Cross-Resistance in  
695 Bacterial Pathogens to Human Therapeutic Antibiotics. *Curr Microbiol* 76.
- 696 6. Singer AC, Shaw H, Rhodes V, Hart A. 2016. Review of Antimicrobial Resistance in the  
697 Environment and Its Relevance to Environmental Regulators. *Front Microbiol* 0:1728.
- 698 7. Drlica K. 2003. The mutant selection window and antimicrobial resistance. *J Antimicrob*  
699 *Chemother.*
- 700 8. Drlica K, Zhao X. 2007. Mutant selection window hypothesis updated. *Clin Infect Dis.*
- 701 9. Gullberg E, Cao S, Berg OG, Ilbäck C, Sandegren L, Hughes D, Andersson DI. 2011.  
702 Selection of resistant bacteria at very low antibiotic concentrations. *PLoS Pathog* 7.
- 703 10. Low YM, Chong CW, Yap IKS, Chai LC, Clarke SC, Ponnampalavanar S, Abdul Jabar  
704 K, Md Yusof MY, Teh CSJ. 2018. Elucidating the survival and response of carbapenem  
705 resistant *Klebsiella pneumoniae* after exposure to imipenem at sub-lethal concentrations.

- 706 Pathog Glob Health 112.
- 707 11. Migliorini LB, Brüggemann H, De Sales RO, Koga PCM, De Souza AV, Martino MDV,  
708 Galhardo RS, Severino P. 2019. Mutagenesis induced by sub-lethal doses of  
709 ciprofloxacin: Genotypic and Phenotypic Differences between the *Pseudomonas*  
710 *aeruginosa* Strain PA14 and Clinical Isolates. *Front Microbiol* 10.
- 711 12. Walker KA, Treat LP, Sepúlveda VE, Miller VL. 2020. The Small Protein RmpD Drives  
712 Hypermucoviscosity in *Klebsiella pneumoniae*. *MBio* 11:1–14.
- 713 13. Wright MH, Adelskov J, Greene AC. 2017. Bacterial DNA Extraction Using Individual  
714 Enzymes and Phenol/Chloroform Separation. *J Microbiol Biol Educ* 18.
- 715 14. Baym M, Kryazhimskiy S, Lieberman TD, Chung H, Desai MM, Kishony RK. 2015.  
716 Inexpensive multiplexed library preparation for megabase-sized genomes. *PLoS One* 10.
- 717 15. Broberg CA, Wu W, Cavalcoli JD, Miller VL, Bachman MA. 2014. Complete genome  
718 sequence of *Klebsiella pneumoniae* strain ATCC 43816 KPPR1, a rifampin-resistant  
719 mutant commonly used in animal, genetic, and molecular biology studies. *Genome*  
720 *Announc* 2.
- 721 16. Barrick JE. 2016. breseq Manual — breseq 0.35.2rc1 documentation.
- 722 17. Martin AP. 2002. Phylogenetic approaches for describing and comparing the diversity of  
723 microbial communities. *Appl Environ Microbiol*.
- 724 18. Domenico P, Schwartz S, Cunha BA. 1989. Reduction of capsular polysaccharide  
725 production in *Klebsiella pneumoniae* by sodium salicylate. *Infect Immun* 57.
- 726 19. Lin TL, Yang FL, Yang AS, Peng HP, Li TL, Tsai MD, Wu SH, Wang JT. 2012. Amino

- 727 Acid Substitutions of MagA in *Klebsiella pneumoniae* Affect the Biosynthesis of the  
728 Capsular Polysaccharide. *PLoS One* 7.
- 729 20. Brunson DN, Maldosevic E, Velez A, Figgins E, Ellis TN. 2019. Porin loss in *Klebsiella*  
730 *pneumoniae* clinical isolates impacts production of virulence factors and survival within  
731 macrophages. *Int J Med Microbiol* 309:213–224.
- 732 21. Kachlany SC, Levery SB, Kim JS, Reuhs BL, Lion LW, Ghiorse WC. 2001. Structure and  
733 carbohydrate analysis of the exopolysaccharide capsule of *Pseudomonas putida* G7.  
734 *Environ Microbiol* 3.
- 735 22. York WS, Darvill AG, McNeil M, Stevenson TT, Albersheim P. 1986. Isolation and  
736 characterization of plant cell walls and cell wall components. *Methods Enzymol* 118.
- 737 23. Turner KL, Cahill BKBK, Dilello SKSK, Gutel D, Brunson DNDN, Albertí S, Ellis  
738 TNTN. 2015. Porin loss impacts the host inflammatory response to outer membrane  
739 vesicles of *Klebsiella pneumoniae*. *Antimicrob Agents Chemother* 60:1360–1369.
- 740 24. Velkov T, Soon RL, Chong PL, Huang JX, Cooper MA, Azad MAK, Baker MA,  
741 Thompson PE, Roberts K, Nation RL, Clements A, Strugnell RA, Li J. 2013. Molecular  
742 basis for the increased polymyxin susceptibility of *Klebsiella pneumoniae* strains with  
743 under-acylated lipid A. *Innate Immun* 19.
- 744 25. Paczosa MK, Meccas J. 2016. *Klebsiella pneumoniae*: Going on the Offense with a Strong  
745 Defense. *Microbiol Mol Biol Rev* 80.
- 746 26. Gomez-Simmonds A, Uhlemann AC. 2017. Clinical implications of genomic adaptation  
747 and evolution of carbapenem-resistant *klebsiella pneumoniae*. *J Infect Dis* 215.

- 748 27. Clinical and Laboratory Standards Institute. 2020. Clinical and Laboratory Standards  
749 Institute (CLSI). Performance Standards for Antimicrobial Susceptibility Testing. 30th  
750 ed. CLSI supplement M100.
- 751 28. Alcock BP, Raphenya AR, Lau TTY, Tsang KK, Bouchard M, Edalatmand A, Huynh W,  
752 Nguyen AL V., Cheng AA, Liu S, Min SY, Miroshnichenko A, Tran HK, Werfalli RE,  
753 Nasir JA, Oloni M, Speicher DJ, Florescu A, Singh B, Faltyn M, Hernandez-Koutoucheva  
754 A, Sharma AN, Bordeleau E, Pawlowski AC, Zubyk HL, Dooley D, Griffiths E, Maguire  
755 F, Winsor GL, Beiko RG, Brinkman FSL, Hsiao WWL, Domselaar G V., McArthur AG.  
756 2020. CARD 2020: antibiotic resistance surveillance with the comprehensive antibiotic  
757 resistance database. *Nucleic Acids Res* 48:D517–D525.
- 758 29. Hendriksen RS, Bortolaia V, Tate H, Tyson GH, Aarestrup FM, McDermott PF. 2019.  
759 Using Genomics to Track Global Antimicrobial Resistance. *Front public Heal* 7.
- 760 30. Campbell EA, Korzheva N, Mustaev A, Murakami K, Nair S, Goldfarb A, Darst SA.  
761 2001. Structural mechanism for rifampicin inhibition of bacterial RNA polymerase. *Cell*  
762 104.
- 763 31. Cai R, Wang G, Le S, Wu M, Cheng M, Guo Z, Ji Y, Xi H, Zhao C, Wang X, Xue Y,  
764 Wang Z, Zhang H, Fu Y, Sun C, Feng X, Lei L, Yang Y, Ur Rahman S, Liu X, Han W,  
765 Gu J. 2019. Three capsular polysaccharide synthesis-related glucosyltransferases, GT-1,  
766 GT-2 and WcaJ, are associated with virulence and phage sensitivity of *Klebsiella*  
767 *pneumoniae*. *Front Microbiol* 10.
- 768 32. Lee CH, Chang CC, Liu JW, Chen RF, Yang KD. 2014. Sialic acid involved in  
769 hypermucoviscosity phenotype of *Klebsiella pneumoniae* and associated with resistance to

- 770 neutrophil phagocytosis. *Virulence* 5.
- 771 33. Lenski RE. 2017. Experimental evolution and the dynamics of adaptation and genome  
772 evolution in microbial populations. *ISME J*.
- 773 34. Good BH, McDonald MJ, Barrick JE, Lenski RE, Desai MM. 2017. The dynamics of  
774 molecular evolution over 60,000 generations. *Nature* 551.
- 775 35. Kleinman A. 2019. Fixation and Adaptation in the Lenski *E. coli* Long Term Evolution  
776 Experiment. *Biomed J Sci Tech Res* 20.
- 777 36. Regué M, Hita B, Piqué N, Izquierdo L, Merino S, Fresno S, Benedí VJ, Tomás JM. 2004.  
778 A Gene, *uge*, Is Essential for *Klebsiella pneumoniae* Virulence. *Infect Immun* 72:54–61.
- 779 37. Martinez JL, Baquero F. 2000. Mutation frequencies and antibiotic resistance. *Antimicrob*  
780 *Agents Chemother*.
- 781 38. Long H, Miller SF, Strauss C, Zhao C, Cheng L, Ye Z, Griffin K, Te R, Lee H, Chen CC,  
782 Lynch M. 2016. Antibiotic treatment enhances the genome-wide mutation rate of target  
783 cells. *Proc Natl Acad Sci U S A* 113.
- 784 39. De Maio N, Shaw LP, Hubbard A, George S, Sanderson ND, Swann J, Wick R, Oun MA,  
785 Stubberfield E, Hoosdally SJ, Crook DW, Peto TEA, Sheppard AE, Bailey MJ, Read DS,  
786 Anjum MF, Sarah Walker A, Stoesser N. 2019. Comparison of long-read sequencing  
787 technologies in the hybrid assembly of complex bacterial genomes. *Microb Genomics* 5.
- 788 40. Slupska MM, Chiang JH, Luther WM, Stewart JL, Amii L, Conrad A, Miller JH. 2000.  
789 Genes involved in the determination of the rate of inversions at short inverted repeats.  
790 *Genes Cells* 5:425–37.

- 791 41. Moskowitz SM, Ernst RK, Miller SI. 2004. PmrAB, a Two-Component Regulatory  
792 System of *Pseudomonas aeruginosa* that Modulates Resistance to Cationic Antimicrobial  
793 Peptides and Addition of Aminoarabinose to Lipid A. *J Bacteriol* 186.
- 794 42. Van Dyk TK, DeRose EJ, Gonye GE. 2001. LuxArray, a high-density, genomewide  
795 transcription analysis of *Escherichia coli* using bioluminescent reporter strains. *J Bacteriol*  
796 183.
- 797 43. Jin DJ, Gross CA. 1988. Mapping and sequencing of mutations in the *Escherichia*  
798 *colirpoB* gene that lead to rifampicin resistance. *J Mol Biol* 202.
- 799 44. Severinov K, Soushko M, Goldfarb A, Nikiforov V. 1994. Rif<sup>R</sup> mutations in the  
800 beginning of the *Escherichia coli rpoB* gene. *MGG Mol Gen Genet* 244.
- 801 45. Alifano P, Palumbo C, Pasanisi D, Talà A. 2015. Rifampicin-resistance, *rpoB*  
802 polymorphism and RNA polymerase genetic engineering. *J Biotechnol* 202.
- 803 46. Colclough AL, Scadden J, Blair JMA. 2019. TetR-family transcription factors in Gram-  
804 negative bacteria: Conservation, variation and implications for efflux-mediated  
805 antimicrobial resistance. *BMC Genomics* 20.
- 806 47. Du S, Lutkenhaus J. 2014. SImA Antagonism of FtsZ Assembly Employs a Two-pronged  
807 Mechanism like MinCD. *PLoS Genet* 10.
- 808 48. Yoshino M, Aihara M, Gotoh Y, Akimoto M, Tatsuhara W, Kiyosuke M, Matsushima Y,  
809 Uchiumi T, Hayashi T, Kang D. 2021. Stepwise Evolution of a *Klebsiella pneumoniae*  
810 Clone within a Host Leading to Increased Multidrug Resistance. *mSphere* 6.
- 811 49. Lopatkin AJ, Bening SC, Manson AL, Stokes JM, Kohanski MA, Badran AH, Earl AM,

- 812 Cheney NJ, Yang JH, Collins JJ. 2021. Clinically relevant mutations in core metabolic  
813 genes confer antibiotic resistance. *Science* 371.
- 814 50. Pal S, Verma J, Mallick S, Rastogi SK, Kumar A, Ghosh AS. 2019. Absence of the  
815 glycosyltransferase wcaJ in *Klebsiella pneumoniae* ATCC13883 affects biofilm formation,  
816 increases polymyxin resistance and reduces murine macrophage activation. *Microbiol*  
817 (United Kingdom) 165.
- 818 51. Yao Z, Kahne D, Kishony R. 2012. Distinct single-cell morphological dynamics under  
819 beta-lactam antibiotics. *Mol Cell* 48:705–712.
- 820 52. Inui T, Endo T, Matsushita T. 2000. Morphological changes and lysis induced by beta-  
821 lactams associated with the characteristic profiles of affinities of penicillin-binding  
822 proteins in *Actinobacillus pleuropneumoniae*. *Antimicrob Agents Chemother* 44:1518–23.
- 823 53. Kessler NG, Caraballo Delgado DM, Shah NK, Dickinson JA, Moore SD. 2021.  
824 Exopolysaccharide anchoring creates an extreme resistance to sedimentation. *J Bacteriol*  
825 203.
- 826 54. Ojkic N, Serbanescu D, Banerjee S. 2022. Antibiotic Resistance via Bacterial Cell Shape-  
827 Shifting. *MBio* 13.
- 828 55. Meredith TC, Mamat U, Kaczynski Z, Lindner B, Holst O, Woodard RW. 2007.  
829 Modification of lipopolysaccharide with colanic acid (M-antigen) repeats in *Escherichia*  
830 *coli*. *J Biol Chem* 282.
- 831 56. Ren G, Wang Z, Li Y, Hu X, Wang X. 2016. Effects of lipopolysaccharide core sugar  
832 deficiency on colanic acid biosynthesis in *Escherichia coli*. *J Bacteriol* 198.



- 833 57. Cephalosporins - Infectious Diseases - Merck Manuals Professional Edition.
- 834 58. Palace SG, Wang Y, Rubin DHF, Welsh MA, Mortimer TD, Cole K, Eyre DW, Walker S,  
835 Grad YH. 2020. Rna polymerase mutations cause cephalosporin resistance in clinical  
836 neisseria gonorrhoeae isolates. *Elife* 9.
- 837 59. Nelson K, Selander RK. 1994. Intergeneric transfer and recombination of the 6-  
838 phosphogluconate dehydrogenase gene (*gnd*) in enteric bacteria. *Proc Natl Acad Sci U S*  
839 *A* 91.
- 840 60. Arakawa Y, Wacharotayankun R, Nagatsuka T, Ito H, Kato N, Ohta M. 1995. Genomic  
841 organization of the *Klebsiella pneumoniae* cps region responsible for serotype K2 capsular  
842 polysaccharide synthesis in the virulent strain chedid. *J Bacteriol* 177.
- 843 61. Jousset AB, Bonnin RA, Rosinski-Chupin I, Girlich D, Cuzon G, Cabanel N, Frech H,  
844 Farfour E, Dortet L, Glaser P, Naas T. 2018. A 4.5-Year Within-Patient Evolution of a  
845 Colistin-Resistant *Klebsiella pneumoniae* Carbapenemase-Producing K. pneumoniae  
846 Sequence Type 258. *Clin Infect Dis* 67:1388–1394.
- 847 62. Tian X, Wang Q, Perlaza-Jiménez L, Zheng X, Zhao Y, Dhanasekaran V, Fang R, Li J,  
848 Wang C, Liu H, Lithgow T, Cao J, Zhou T. 2020. First description of antimicrobial  
849 resistance in carbapenem-susceptible *Klebsiella pneumoniae* after imipenem treatment,  
850 driven by outer membrane remodeling. *BMC Microbiol* 20.
- 851 63. Aihara M, Nishida R, Akimoto M, Gotoh Y, Kiyosuke M, Uchiumi T, Nishioka M,  
852 Matsushima Y, Hayashi T, Kang D. 2021. Within-host evolution of a *Klebsiella*  
853 *pneumoniae* clone: selected mutations associated with the alteration of outer membrane  
854 protein expression conferred multidrug resistance. *J Antimicrob Chemother* 76:362–369.

855 64. Chebotar I V., Emelyanova MA, Bocharova JA, Mayansky NA, Kopantseva EE,  
856 Mikhailovich VM. 2021. The classification of bacterial survival strategies in the presence  
857 of antimicrobials. *Microb Pathog.*

858

Figure 1:

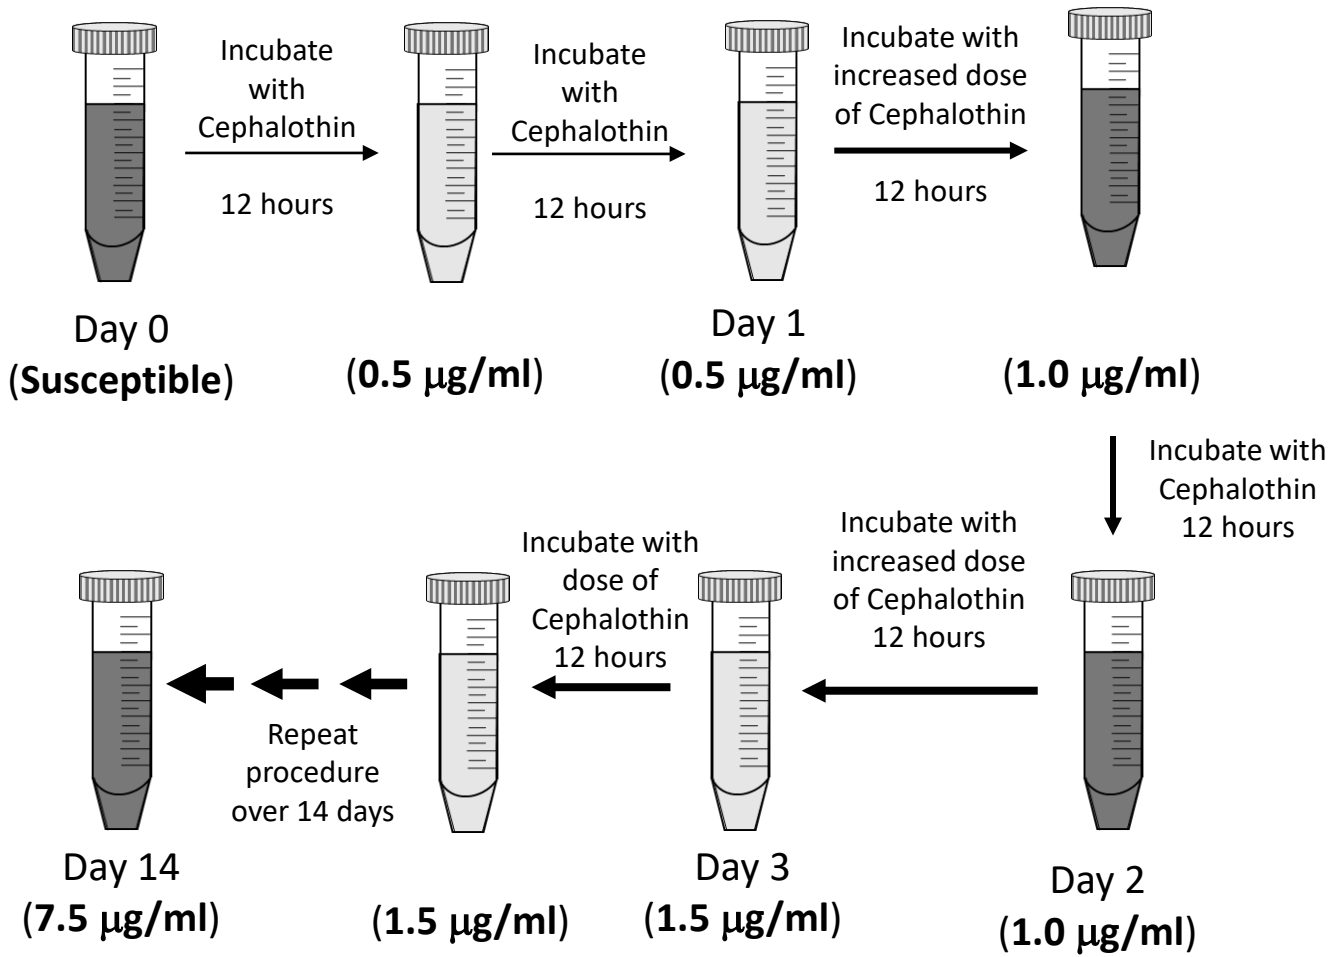

**Table 1: Changes in growth rates because of low dose antibiotic exposure**

| Time (Minutes) from Subculture<br>to OD <sub>600</sub> 1.0 |                                                               |                      |                               |                                                            |
|------------------------------------------------------------|---------------------------------------------------------------|----------------------|-------------------------------|------------------------------------------------------------|
| Elapsed Time of<br>Culture (Hours)                         | Cephalothin Dose for<br>Antibiotic Treated<br>Culture (µg/ml) | Untreated<br>Culture | Antibiotic<br>Treated Culture | Increase in growth time<br>(Minutes) of treated<br>culture |
| 36                                                         | 1                                                             | 120                  | 195                           | 53                                                         |
| 60                                                         | 1.5                                                           | 180                  | 195                           | 53                                                         |
| 84                                                         | 2                                                             | 135                  | 177                           | 35                                                         |
| 108                                                        | 2.5                                                           | 130                  | 165                           | 23                                                         |
| 132                                                        | 3                                                             | 140                  | 160                           | 18                                                         |
| 156                                                        | 3.5                                                           | 130                  | 155                           | 13                                                         |
| 180                                                        | 4                                                             | 132.5                | 180                           | 38                                                         |
| 204                                                        | 4.5                                                           | 135                  | 165                           | 23                                                         |
| 23228                                                      | 5                                                             | 137                  | 165                           | 23                                                         |
| 252                                                        | 5.5                                                           | 150                  | 240                           | <b>98</b>                                                  |
| 276                                                        | 6                                                             | 145                  | 375                           | <b>233</b>                                                 |
| 300                                                        | 6.5                                                           | 152                  | 390                           | <b>248</b>                                                 |
| 324                                                        | 7                                                             | 148                  | 245                           | <b>103</b>                                                 |
| 348                                                        | 7.5                                                           | 155                  | 350                           | <b>208</b>                                                 |
| 372                                                        | 7.5 (final culture)                                           | 155                  | 180                           | 38                                                         |

Figure 2:

**A.**

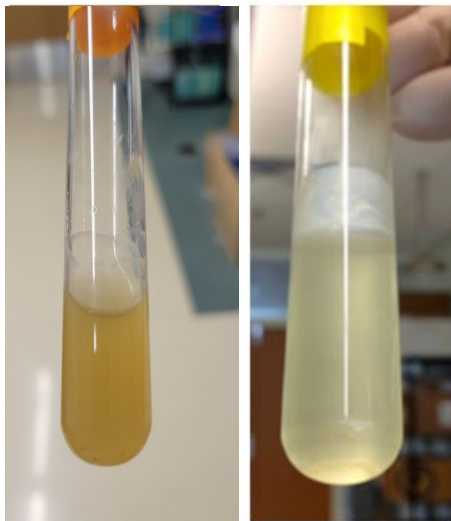

Untreated  
Culture

Treated  
Culture

**B.**

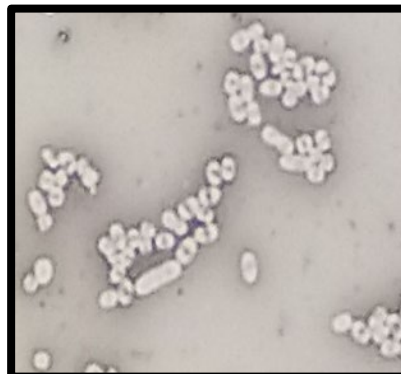

**C.**

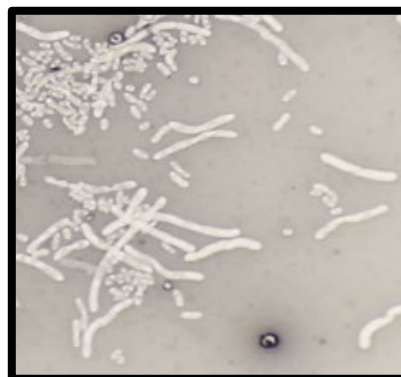

**D.**

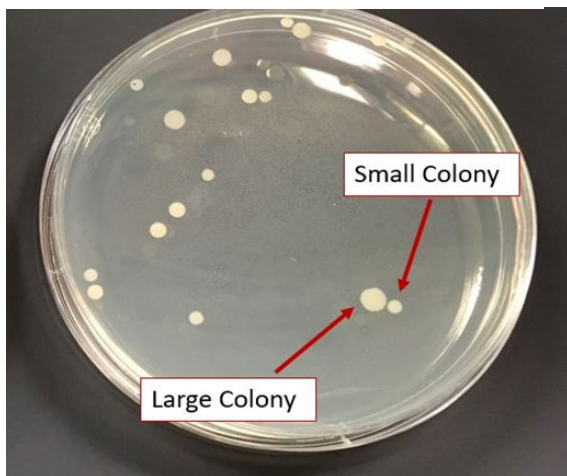

**Table 2: Minimum Inhibitory Concentration Breakpoints of *K. pneumoniae* 43816 cultures after progressive low dose Exposure**

| <u>Antibiotic</u> | <u><i>K. pneumoniae</i></u><br><u>43816</u> | <u>Day 14</u><br><u>Untreated</u> | <u>Day 14 Adapted</u> | <u><i>K. pneumoniae</i></u><br><u>43816 <math>\Delta wcaJ</math></u> | <u>Adapted</u><br><u>Large Colony</u> | <u>Adapted</u><br><u>Small Colony</u> |
|-------------------|---------------------------------------------|-----------------------------------|-----------------------|----------------------------------------------------------------------|---------------------------------------|---------------------------------------|
| Tetracycline      | 0.5 µg/mL                                   | 1 µg/mL                           | 16 µg/mL*             | 4 µg/mL                                                              | 8 µg/mL*                              | 8 µg/mL*                              |
| Cephalothin       | 4 µg/mL                                     | 4 µg/mL                           | 125 µg/mL*            | 16 µg/mL**                                                           | 500 µg/mL*                            | 125 µg/mL*                            |
| Cefoxitin         | 2 µg/mL                                     | 8 µg/mL                           | 64 µg/mL*             | 16 µg/mL**                                                           | 64 µg/mL*                             | 128 µg/mL*                            |
| Cefotaxime        | 1 µg/mL                                     | 8 µg/mL                           | 8 µg/mL               | 1 µg/mL                                                              | 1 µg/mL                               | 8 µg/mL                               |
| Cefepime          | 1 µg/mL                                     | 8 µg/mL                           | 8 µg/mL               | 1 µg/mL                                                              | 1 µg/mL                               | 8 µg/mL                               |
| Imipenem          | 1 µg/mL                                     | 1 µg/mL                           | 1 µg/mL               | 1 µg/mL                                                              | 2 µg/mL                               | 1 µg/mL                               |
| Amikacin          | 0.5 µg/mL                                   | 1 µg/mL                           | 2 µg/mL               | 1 µg/mL                                                              | 0.5 µg/mL                             | 0.5 µg/mL                             |

\* Indicates MICs above the CLSI Cutoff for clinical resistance

\*\* Indicates MICs at the CLSI Cutoff for clinical resistance

**Table 3: Non-synonymous Single Nucleotide Polymorphisms and Genomic Changes Identified in 14 Day Adapted Culture**

| <b>Position</b> | <b>Change in Sequence</b> | <b>Depth of Coverage</b> | <b>Gene/Promoter</b> | <b>Gene Family</b>                       |
|-----------------|---------------------------|--------------------------|----------------------|------------------------------------------|
| 10279           | G→C                       | 43                       | Gene                 | SGNH/GDSL hydrolase                      |
| 10285           | G→C                       | 43                       | Gene                 | SGNH/GDSL hydrolase                      |
| 10412           | T Deletion                | 56                       | Promoter             | SGNH/GDSL hydrolase                      |
| 412527          | G Deletion                | 100                      | Gene                 | N-acetyltransferase                      |
| 1125537         | Insertion T               | 100                      | Gene                 | Globin                                   |
| 2008934         | Insertion TTTCGCTA        | 100                      | Gene                 | TetR/AcrR Transcription regulator        |
| 2063994         | C Deletion                | 100                      | Gene                 | ABC Transporter                          |
| 3225592         | C Deletion                | 100                      | Gene                 | RmuC DNA Recombination                   |
| 5188116         | T → G                     | 100                      | Gene                 | UDP Phosphate Glucose Phosphotransferase |
| 2657272         | G Deletion                | 100                      | Promoter             | Peptide Chain Release Factor 3           |
| 1078904         | C Deletion                | 100                      | Promoter             | LysR Transcriptional Regulator           |
| 1294495         | G Deletion                | 100                      | Promoter             | Type II Aspariginase                     |
| 1823692         | A Insertion               | 100                      | Promoter             | Pyrimidine Photo-lyase                   |
| 5050494         | A Insertion               | 100                      | Promoter             | Cyclic Di-GMP Phosphodiesterase          |

**Table 4: SNPs and Genomic Changes Identified in Large and Small Colony Variants of Adapted Culture**

| Colony Variant        | Position  | Original           | New            | Coverage<br>(Small/Large) | Gene                                                          |
|-----------------------|-----------|--------------------|----------------|---------------------------|---------------------------------------------------------------|
| Small and Large       | 2,008,948 | .                  | Insert TATTCGC | 100/52                    | TetR/AcrR family transcriptional regulator                    |
| Small and Large       | 3,191,984 | A                  | T              | 100/100                   | <i>rpoB</i> /DA-directed RNA polymerase subunit beta          |
| Large                 | 1,548,640 | Unspecified        | Unspecified    | 15                        | ComEC family protein                                          |
| Small                 | 4,676,685 | T                  | G              | 100                       | YfiR family protein                                           |
| Small                 | 5,187,773 | Deletion 2,103 bp. | .              | 100                       | <i>wcaJ</i> and <i>gndA</i>                                   |
| Final adapted mixture | 5,187,772 | T                  | G              | 64                        | <i>wcaJ</i> Undecaprenyl phosphate-glucose phosphotransferase |
| Final adapted mixture | 5,189,876 | unspecified        | unspecified    | 64                        | <i>gndA</i> NADP-dependent phosphogluconate dehydrogenase     |



Figure 3:

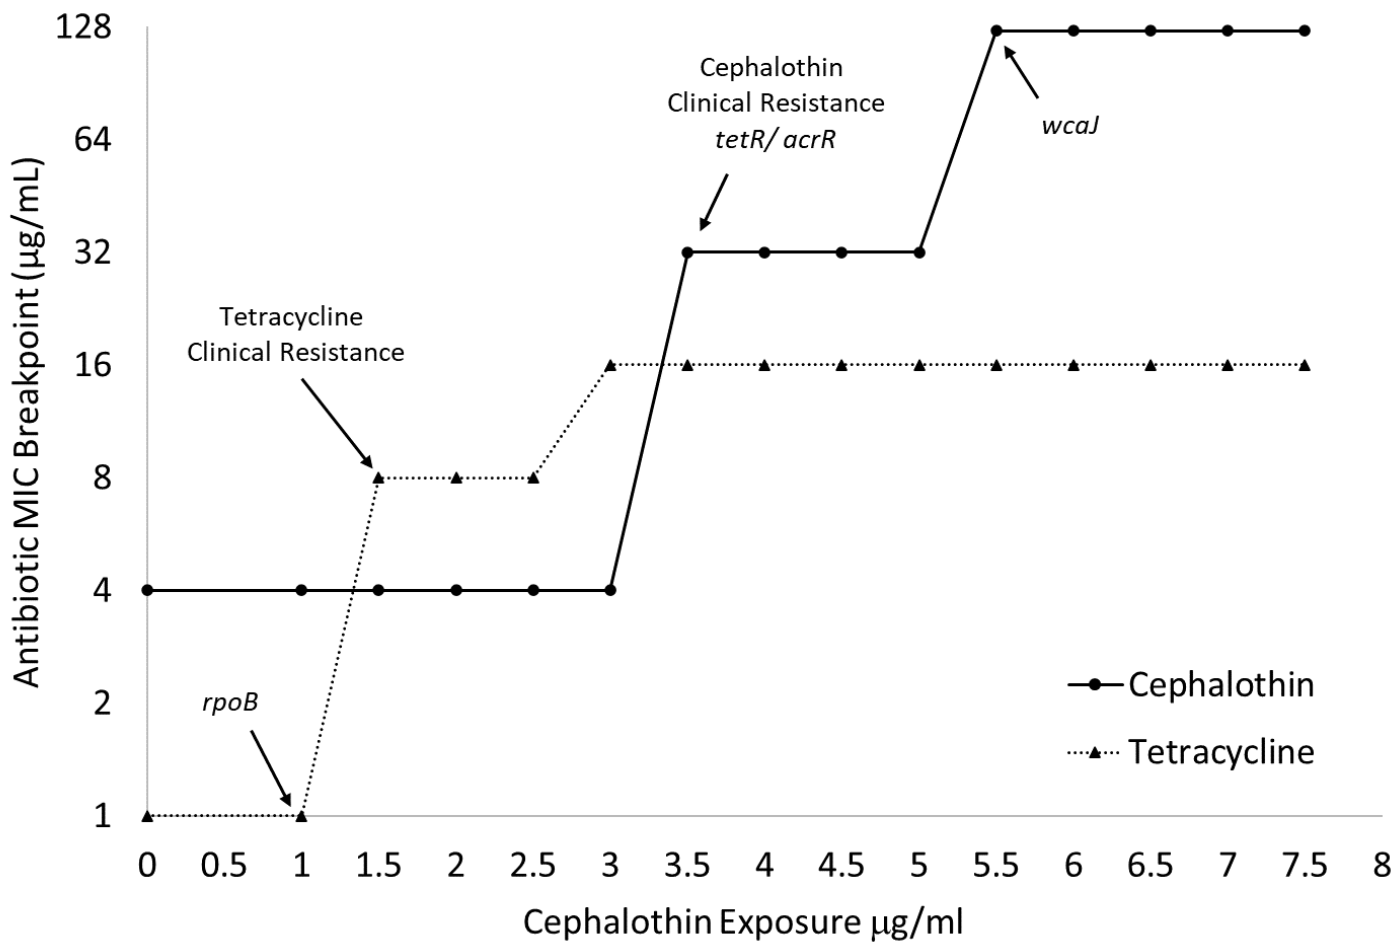

Figure 5:

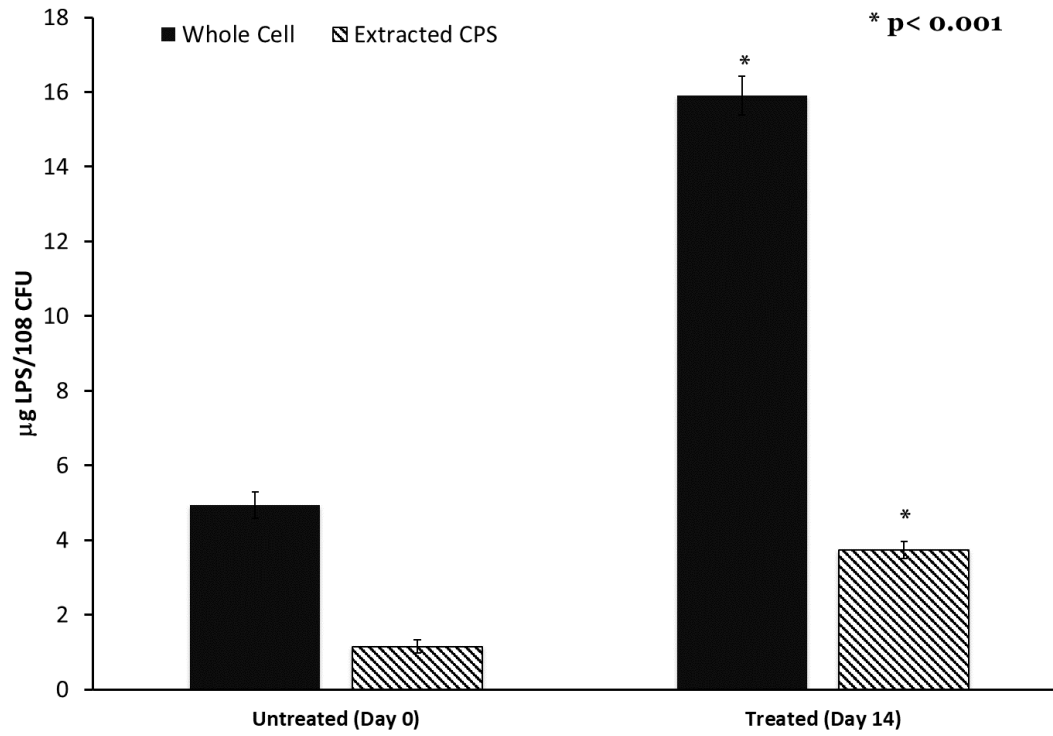

Figure 4:

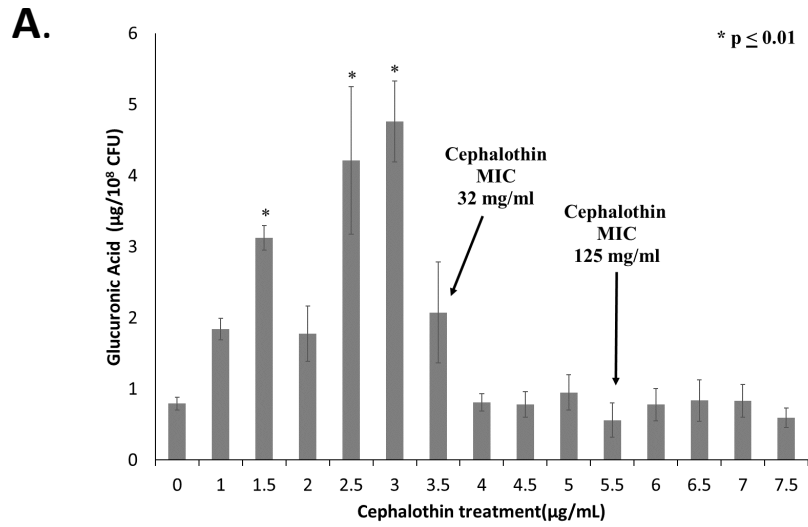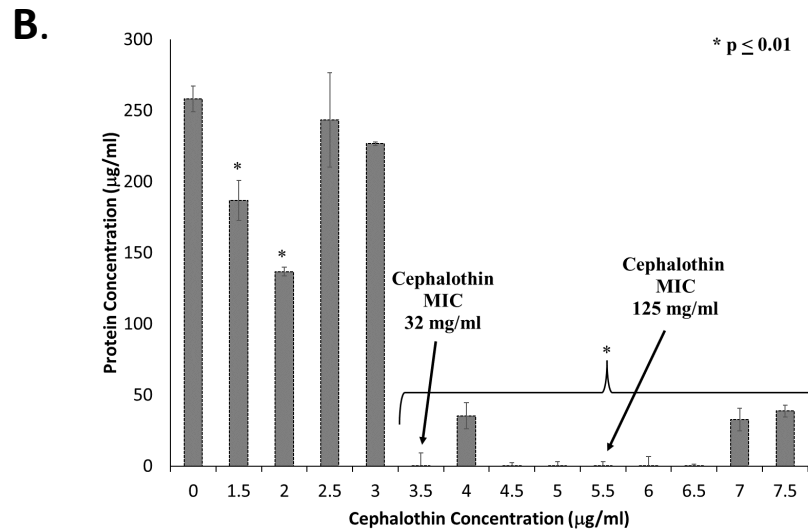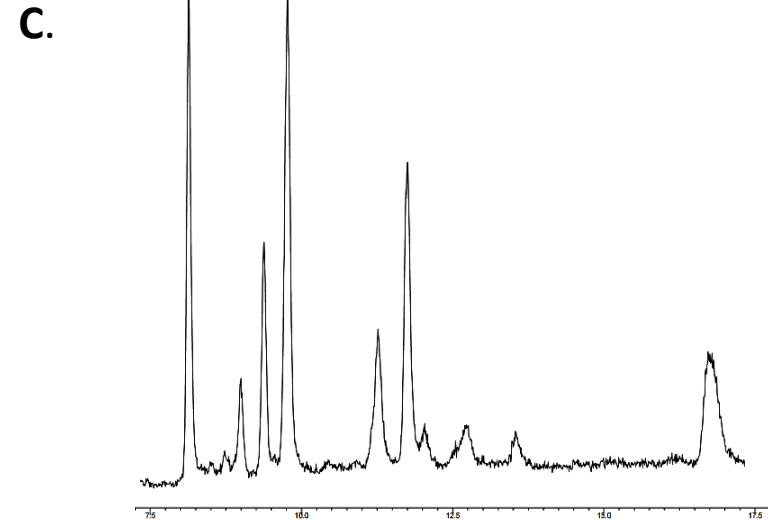

Untreated

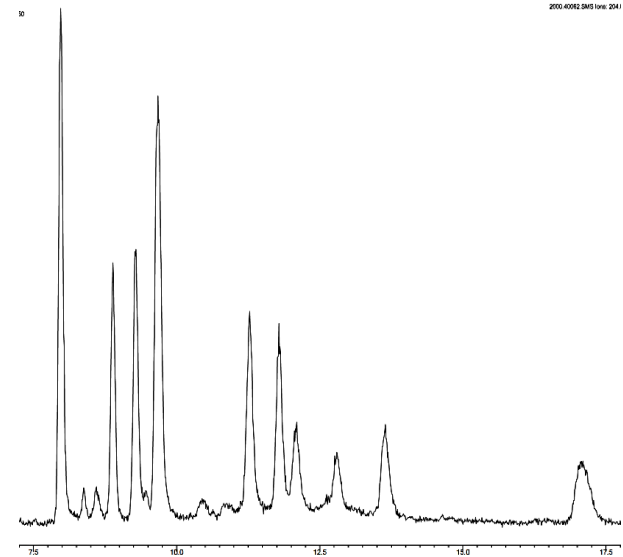

14 day Adapted Culture
